# Supplementary material for: Subfamily evolution analysis using nuclear and chloroplast data from the same reads
Source: bioRxiv or medRxiv preprint supplement (doi:10.1101/2024.01.15.575800), 2024-12-10

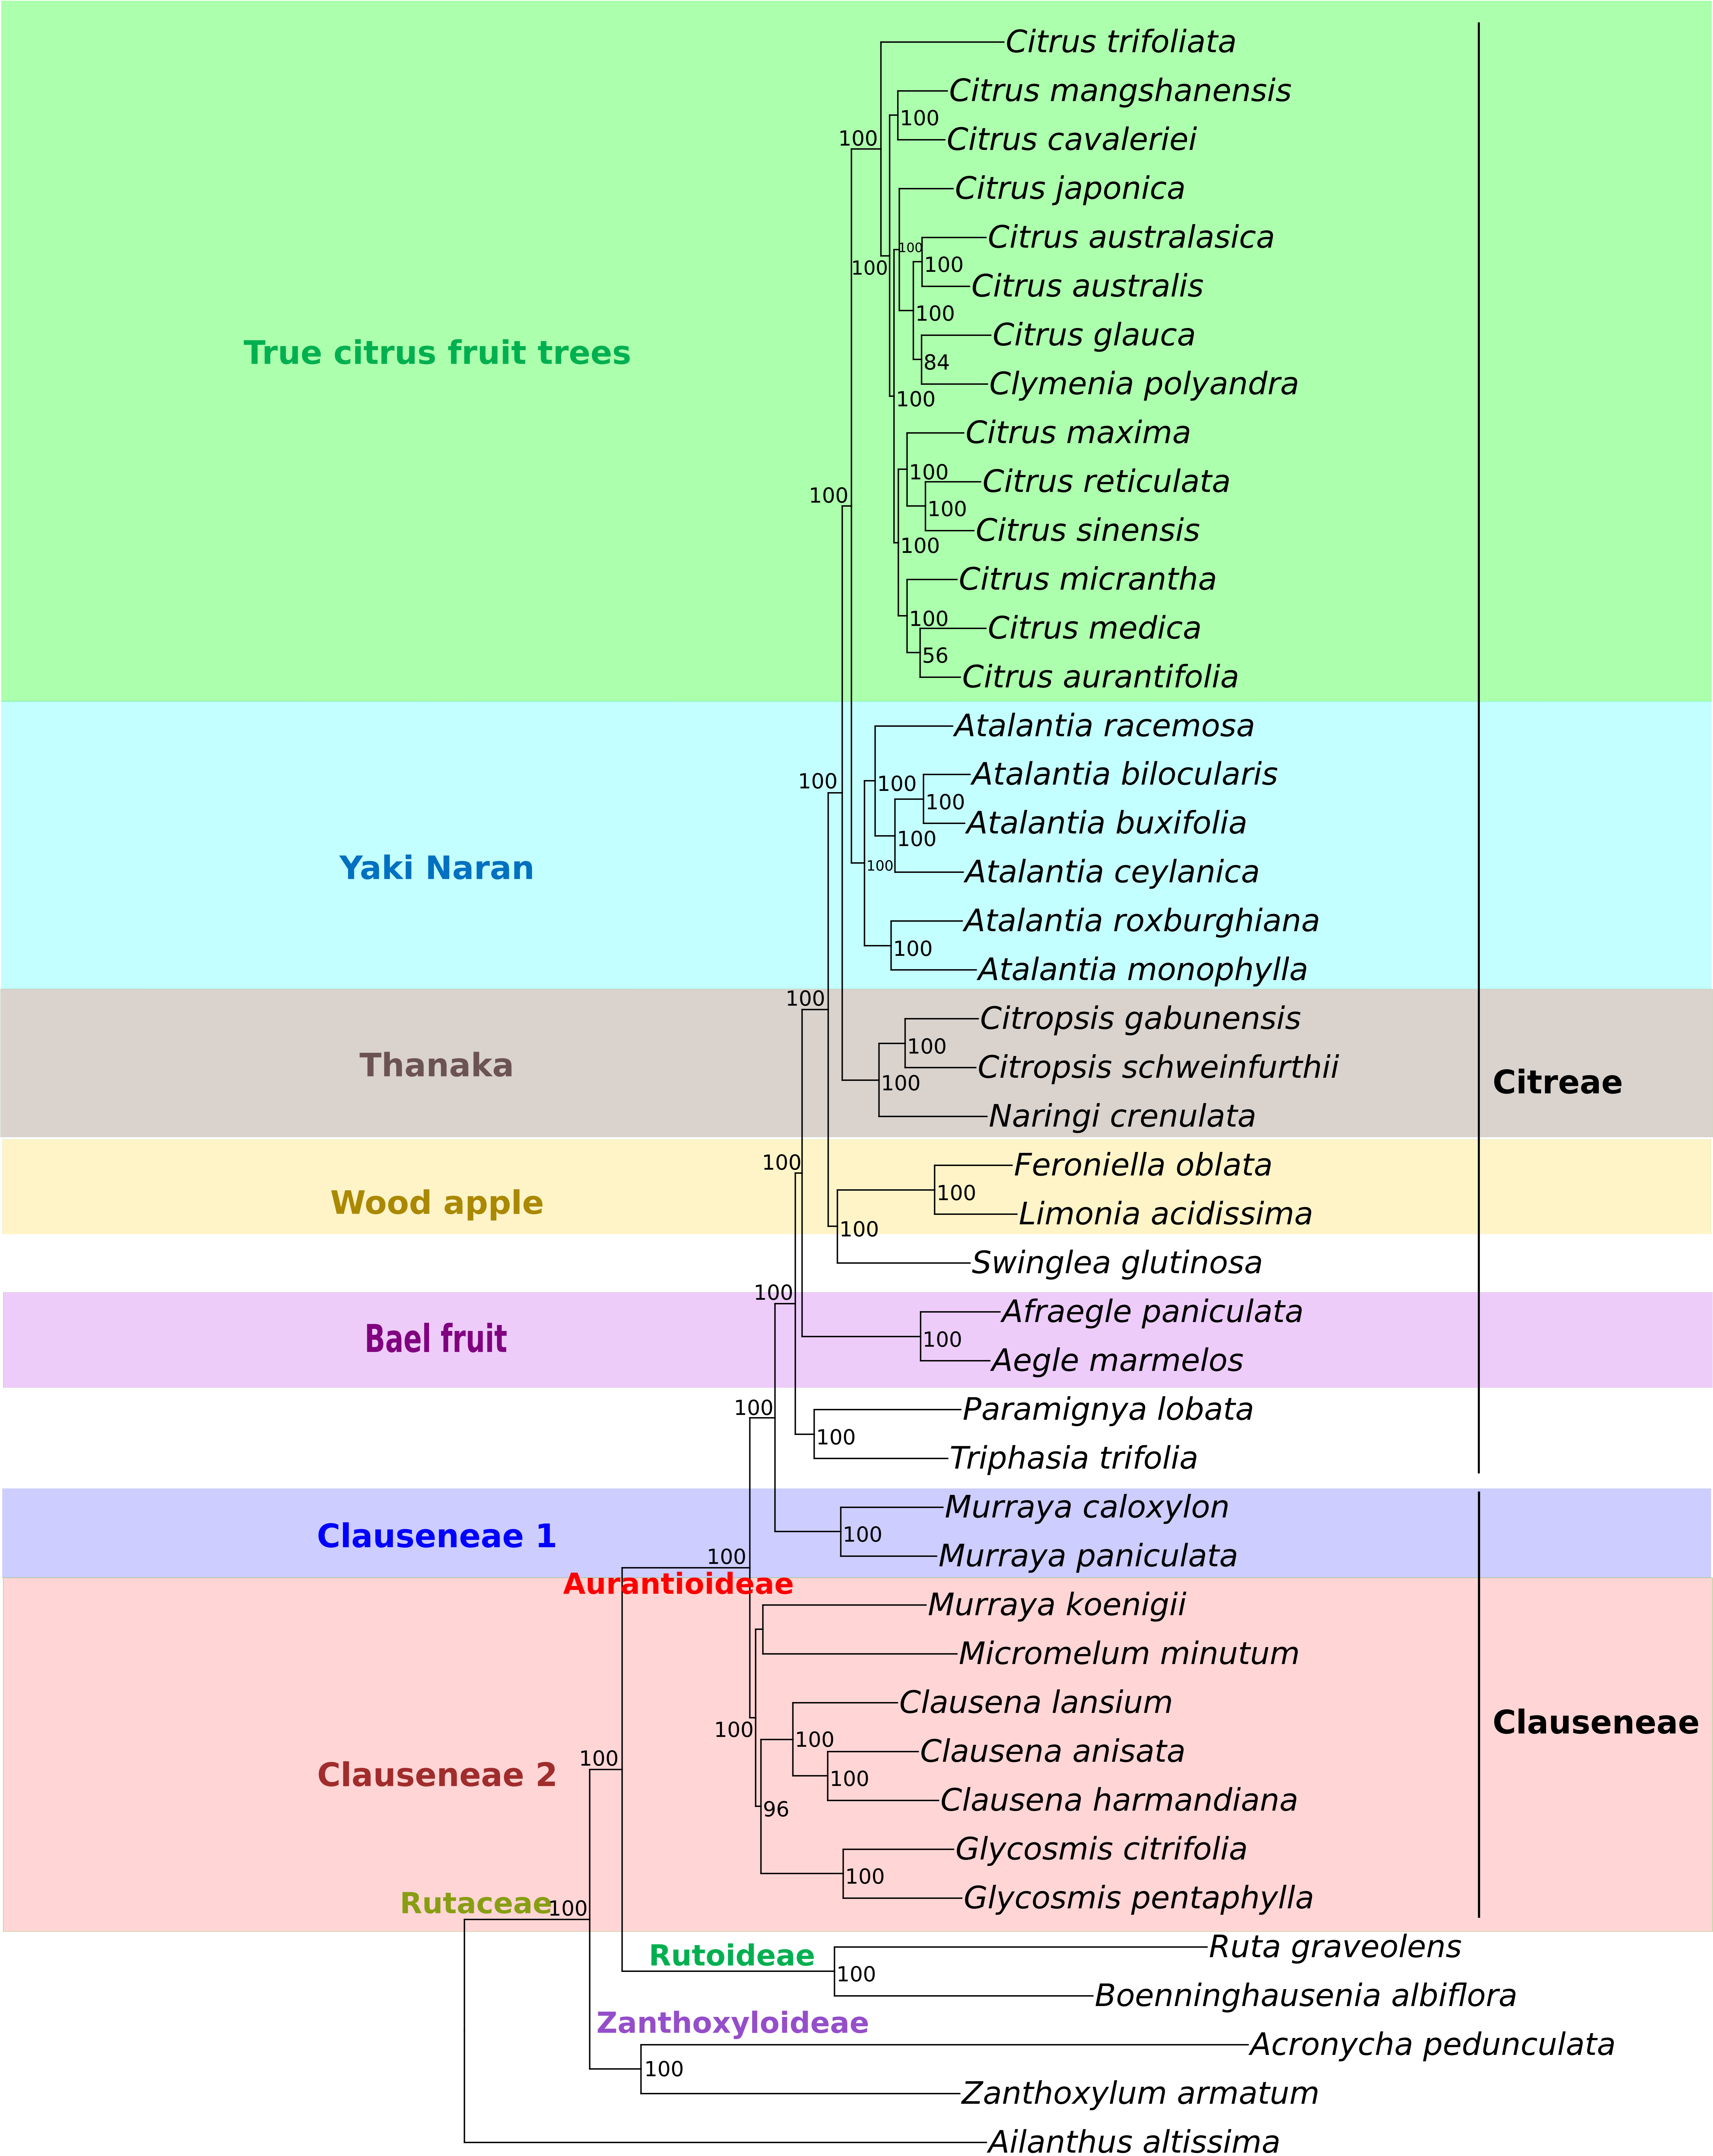

Supplement: Supplementary file [file media-2.pdf]
